# Supplementary material for: Long-Term Phellodendri Cortex Supplementation in the Tiger Grouper (Epinephelus fuscoguttatus): Dual Effects on Intestinal Health Revealed by Transcriptome Analysis
Source: MDPI journal article supplement (doi:10.3390/life13122336), 2023-12-13
Supplement: s1 [file s1]

## Supplementary materials

**Table S1.** Primers used for qPCR.

| Gene ID | Forward primer(5'→3')     | Reverse primer(5'→3')     |
|---------|---------------------------|---------------------------|
| AKTIP   | GGCAAAGGAGCGGATGTTC       | CGGCTTCACCCAAGACAGA       |
| AKT1S1  | TGTTGCCAAGTTGCTGGTGAT     | GTGGGAGAATGTAGAATACGTCTGA |
| CASP3   | CTGGGCTTCAAGGTGGACAT      | CCCGTGAGACGACAAGACAG      |
| HYP     | GGGAGGAAGATGACAGGATGG     | CCCGAAGTTTACGACCGATT      |
| CATB    | ACGTCCGACTTCATGCACTACAC   | ACGTCCGACTTCATGCACTACAC   |
| CATL    | GCCATCTTATCTGTCTGCTCAA    | ACAGTTGCTTTGTAACGGATTCTC  |
| TUA8    | CGATCACAAGTTCGACCTCATG    | ACCCAAATCCTCGTAATCCCT     |
| CLAU-10 | TCATCACCACAGCGACCTT       | CCAGCATCGAGGGAAAGTC       |
| MYO11   | TATTCGCCAGGCCAACACT       | GCCATCAGGAAACGATAGGAG     |
| MYO10   | TGTTCAAGGTGGGTCAGAGTAA    | GGAAGCGTATAATGGTGTCACTG   |
| ADGPL3  | ACTTCATTTGGAGTTTCATAGGACC | ACCCACGATTTGATGTTGTCC     |
| GJ32P   | TCTTTATGTTGGCAATGTCCG     | CTCTGAACTGCTGTTCTTCCTTTT  |
| GJD3P   | GGTTACCGCCCAGGACTACA      | GAAAGCCAATCTCCGCCAC       |
| GJ32PL  | CCTCTTTGGCACATACATAACC    | GGCACAGGGTGGAGACATT       |
| rGAP    | GGTGTTCGACATCGTTCCTGC     | CTTCTTCGTACCTGGTATTTGAGG  |
| 18 S    | CGGTGGTACTTTCTGTGC        | TGTGGTAGCCGTTTCTCA        |

**Table S2.** Effects of PC diet on growth performance of tiger grouper after 8-week feeding trial.

| Item                     | C                       | PC                      |
|--------------------------|-------------------------|-------------------------|
| SSI, %                   | 0.13±0.05 <sup>a</sup>  | 0.12±0.04 <sup>a</sup>  |
| HSI, %                   | 0.188±0.41 <sup>a</sup> | 1.62±0.5 <sup>a</sup>   |
| SGR, %*day <sup>-1</sup> | 3.67±0.75 <sup>a</sup>  | 3.45±0.17 <sup>a</sup>  |
| WGR, %                   | 35.12±1.92 <sup>a</sup> | 33.08±2.12 <sup>a</sup> |

SSI: Spleen somatic indices; HSI: hepatopancreas somatic indices; SGR: Specific growth rate; WGR: Weight gain rate; Data was presented as mean ± SE. Values with different superscripts in the same row were significantly different ( $P < 0.05$ ). The lack of superscript letter indicated no significant differences among groups ( $P > 0.05$ ).

**Table S3.** Statistics of unigenes assembled.

| Type                        | Resource    |
|-----------------------------|-------------|
| Total unigenes number       | 67825       |
| Largest unigene length(bp)  | 22824       |
| Smallest unigene length(bp) | 201         |
| Average unigene length(bp)  | 1369.6      |
| <sup>a</sup> N50            | 2173        |
| <sup>b</sup> E90N50         | 2750        |
| GC percent                  | 45.17       |
| Mean mapped reads           | 1883.606843 |

<sup>a</sup> : The assembled unigenes were sorted according to the length, N50 represents the length of the corresponding transcript when the length of unigenes is accumulated to half of the total length; <sup>b</sup> : The unigenes with the top 90% expression were sorted according to the length. E90N50 represents the length of the corresponding transcript when the length of the transcript is accumulated to half of the total length.

**Table S4.** Statistics of annotation results for intestine transcriptome unigenes.

| Sample | Clean reads | Clean bases | Error rate (%) | Q20(%) | Q30(%) | GC content (%) |
|--------|-------------|-------------|----------------|--------|--------|----------------|
| C_1    | 42868780    | 6402362666  | 0.0243         | 98.33  | 94.82  | 48.2           |
| C_2    | 50759038    | 7554392639  | 0.0241         | 98.4   | 95     | 47.46          |
| C_3    | 45485416    | 6789238074  | 0.0246         | 98.21  | 94.48  | 47.98          |
| C_4    | 49994434    | 7458281090  | 0.0242         | 98.37  | 94.9   | 48.71          |
| C_5    | 46643140    | 6953372256  | 0.0241         | 98.4   | 95     | 48.27          |
| PC_1   | 56396278    | 8419828751  | 0.0241         | 98.41  | 95.02  | 48.69          |
| PC_2   | 49936814    | 7450822733  | 0.0241         | 98.4   | 95.01  | 49.36          |
| PC_3   | 48444140    | 7220277276  | 0.0239         | 98.48  | 95.2   | 48.56          |
| PC_4   | 55973024    | 8354387035  | 0.0242         | 98.36  | 94.87  | 48.11          |
| PC_5   | 49105230    | 7326443055  | 0.0244         | 98.29  | 94.71  | 48.53          |

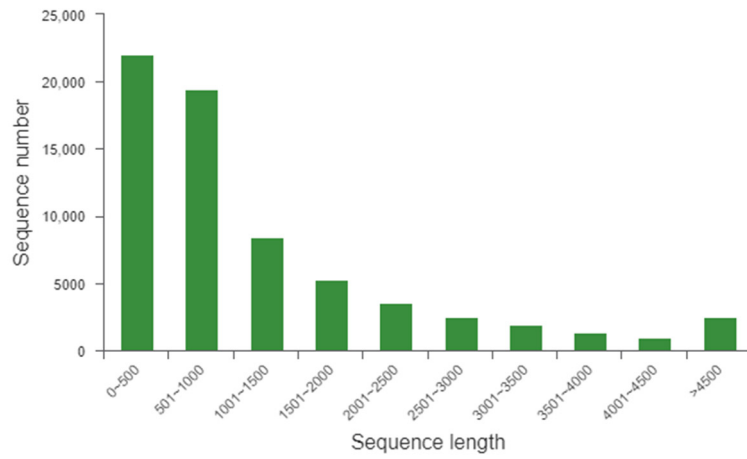

**Figure S1.** The length distribution of the unigenes.

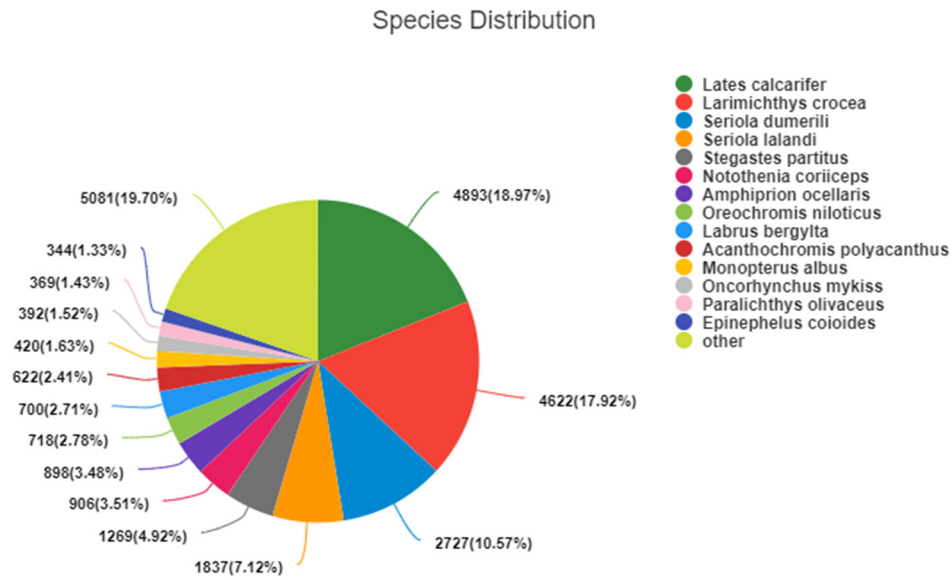

**Figure S2.** The species distribution based on Nr annotation.

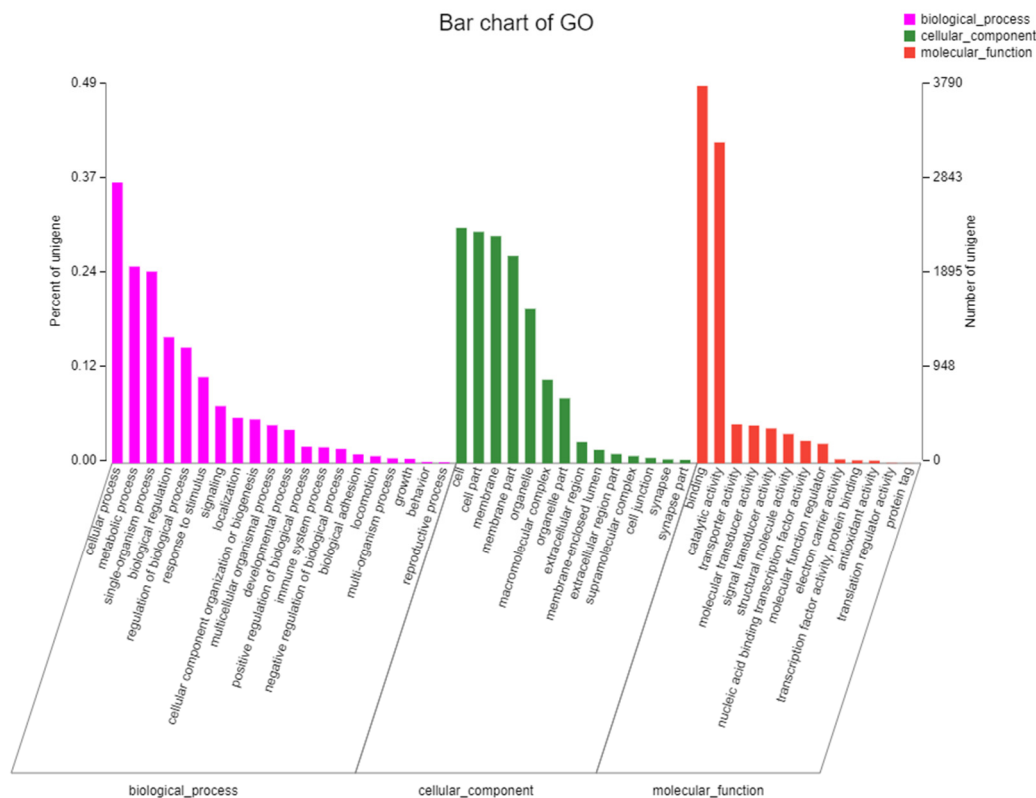

Figure S3. Top 47 annotated GO terms in the intestine transcriptome of *E. fuscoguttatus*.

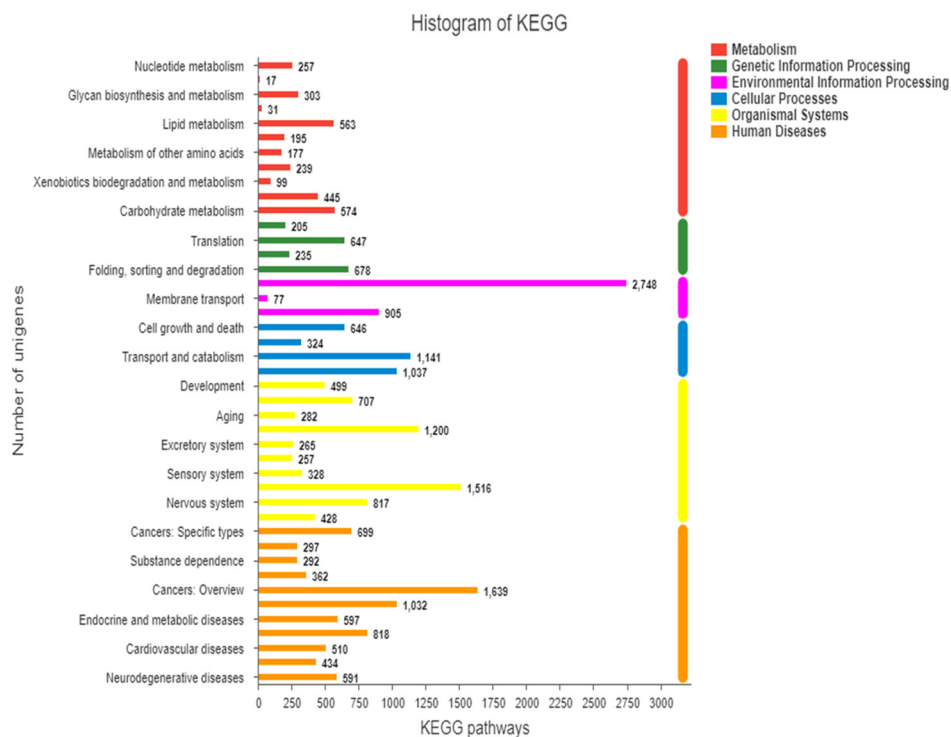

Figure S4. Annotated KEGG pathways in the intestine transcriptome of *E. fuscoguttatus*.
